# Supplementary material
Source: Springer Nature journal article supplement (https://www.springermedizin.de/resource/supplementary/12913_2012_2518_MOESM2_ESM.pdf/9532102)

# Proportion of health workers by cadre

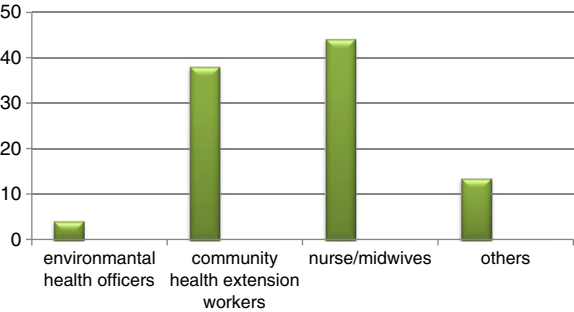

Supplement: MOESM2 [file 9532102]
